# Supplementary material for: On the origin of functionalization in one-pot radiation synthesis of nanogels from aqueous polymer solutions
Source: Royal Society of Chemistry journal article supplement (doi:10.1039/c5ra23926e), 2015-12-23
Supplement: c5ra23926e1.pdf [file c5ra23926e1.pdf]

## Supporting information

### On the origin of functionalization in one-pot radiation synthesis of nanogels from aqueous polymer solutions

C. Dispenza,<sup>a,d,\*</sup> M. A. Sabatino,<sup>a</sup> N. Grimaldi,<sup>a,†</sup> M. R. Mangione,<sup>b</sup> M. Walo,<sup>c</sup> E. Murugan<sup>d</sup> and M. Jonsson<sup>d</sup>

<sup>a</sup> Dipartimento di Ingegneria Chimica, Gestionale, Informatica, Meccanica, Università degli Studi di Palermo, Viale delle Scienze, Edificio 6, 90128 Palermo, Italy

<sup>b</sup> CNR - Istituto di Biofisica (IBF) UOS Palermo, Via U. La Malfa 153, 90146 Palermo, Italy

<sup>c</sup> Centre for Radiation Research and Technology, Institute of Nuclear Chemistry and Technology, Dorodna 16, 03-195 Warsaw, Poland

<sup>d</sup> School of Chemical Science and Engineering, Applied Physical Chemistry, KTH Royal Institute of Technology, SE – 100 44 Stockholm, Sweden

\*Current address: Nanomol Technologies SA, Mòdul de Recerca B, Campus Universitari de Bellaterra, 08193, Cerdanyola del Vallès, Spain

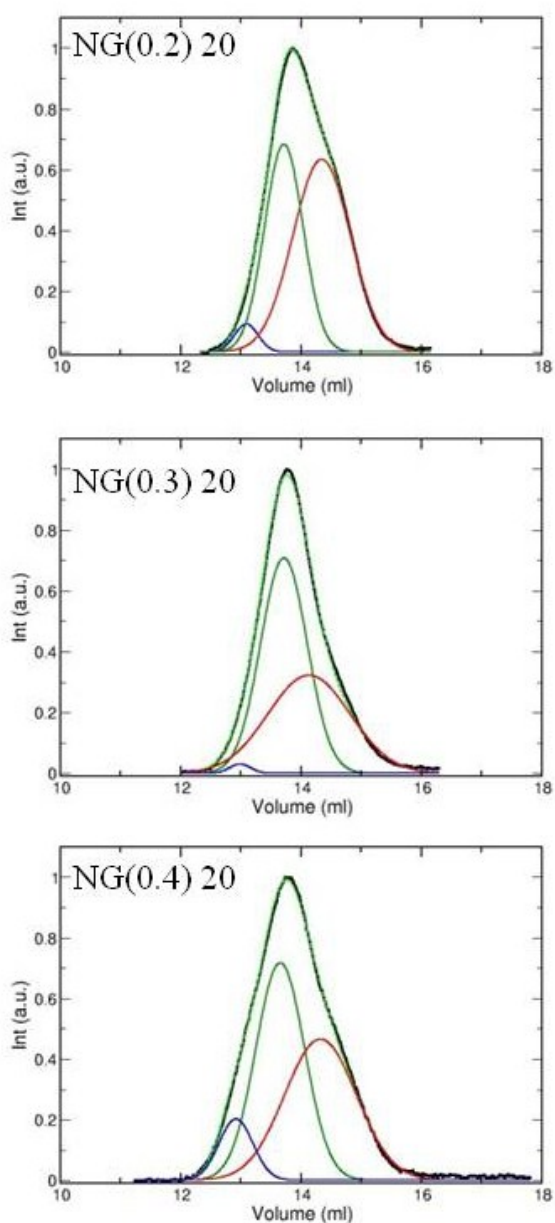

Fig S.1: Deconvolution of the multimodal chromatographic profiles for 0.2, 0.3 and 0.4 wt% nanogel samples produced at 20 kGy.

Table S.1: Percentage area of Gaussians obtained by the deconvolution of multimodal chromatographic profiles for samples produced at 20 kGy, varying the polymer concentration.

| Sample     | Volume 13,0 mL | Volume 13,7 mL | Volume 14.3 mL |
|------------|----------------|----------------|----------------|
| NG(0.2) 20 | 3.3            | 41.3           | 55.4           |
| NG(0.3) 20 | 1.3            | 54.6           | 44.1           |
| NG(0.4) 20 | 6.0            | 65.0           | 29.0           |
